# Supplementary material
Source: HighWire-hosted journal article supplement (https://www.annals.org/content/suppl/2004/09/14/141.6.446)
Supplement: Lappe_AF2_141-6-446-DC1-2.pdf [file Lappe_AF2_141-6-446-DC1-2.pdf]

Appendix Figure 3. Discharge orders form.

|                                     |                                 |                       |
|-------------------------------------|---------------------------------|-----------------------|
| Last Name                           | First Name                      | Middle Initial        |
| Account #                           | EMMI # (Unit #)                 | Discharge MD #        |
| Date of Discharge<br>____/____/____ | Date of Birth<br>____/____/____ | MD Name (Last, First) |

- |                                            |                                             |                                         |                                         |
|--------------------------------------------|---------------------------------------------|-----------------------------------------|-----------------------------------------|
| <input type="checkbox"/> Alta View         | <input type="checkbox"/> Delta Community    | <input type="checkbox"/> Logan Regional | <input type="checkbox"/> Sevier Valley  |
| <input type="checkbox"/> American Fork     | <input type="checkbox"/> Dixie Regional     | <input type="checkbox"/> McKay-Dee      | <input type="checkbox"/> Utah Valley    |
| <input type="checkbox"/> Bear River Valley | <input type="checkbox"/> Fillmore Community | <input type="checkbox"/> Orem Community | <input type="checkbox"/> Valley View    |
| <input type="checkbox"/> Cassia Regional   | <input type="checkbox"/> Heber Valley       | <input type="checkbox"/> Sanpete Valley | <input type="checkbox"/> Wasatch County |
| <input type="checkbox"/> Cottonwood        | <input type="checkbox"/> LDS Hospital       |                                         |                                         |

| Diagnosis                                                                                                                                                                                                                                                                                                           | Discharge                                                                                                                                                                                                                                                                                  | Contraindications/Exclusions                                                                                                                                                                                                                                                                                                                                                   |
|---------------------------------------------------------------------------------------------------------------------------------------------------------------------------------------------------------------------------------------------------------------------------------------------------------------------|--------------------------------------------------------------------------------------------------------------------------------------------------------------------------------------------------------------------------------------------------------------------------------------------|--------------------------------------------------------------------------------------------------------------------------------------------------------------------------------------------------------------------------------------------------------------------------------------------------------------------------------------------------------------------------------|
| <input type="checkbox"/> CAD<br><i>(with or without MI)</i>                                                                                                                                                                                                                                                         | ASA / Antiplatelet<br><input type="checkbox"/> Yes – ASA<br><input type="checkbox"/> Yes – Antiplatelet<br><input type="checkbox"/> No                                                                                                                                                     | <input type="checkbox"/> None documented<br><input type="checkbox"/> Allergy<br><input type="checkbox"/> Other _____<br><input type="checkbox"/> DC on Warfarin<br><input type="checkbox"/> Recent GI Bleed                                                                                                                                                                    |
|                                                                                                                                                                                                                                                                                                                     | HmG Agent<br><input type="checkbox"/> Yes<br><input type="checkbox"/> No<br><input type="checkbox"/> Lipid Lowering Agent                                                                                                                                                                  | <input type="checkbox"/> None documented<br><input type="checkbox"/> Allergy<br><input type="checkbox"/> LDL <100<br><input type="checkbox"/> Other _____                                                                                                                                                                                                                      |
|                                                                                                                                                                                                                                                                                                                     | ACE Inhibitor (ARB)<br><input type="checkbox"/> Yes – ACE<br><input type="checkbox"/> Yes – ARB<br><input type="checkbox"/> No                                                                                                                                                             | <input type="checkbox"/> None documented<br><input type="checkbox"/> Allergy<br><input type="checkbox"/> Hypotension<br><input type="checkbox"/> Moderate or severe aortic stenosis<br><input type="checkbox"/> Other _____<br><input type="checkbox"/> Renal failure<br><input type="checkbox"/> Renal insufficiency<br><input type="checkbox"/> Renal stenosis               |
| <input type="checkbox"/> Post Acute MI                                                                                                                                                                                                                                                                              | Beta Blocker<br><input type="checkbox"/> Yes<br><input type="checkbox"/> No                                                                                                                                                                                                                | <input type="checkbox"/> None documented<br><input type="checkbox"/> Allergy<br><input type="checkbox"/> Hypotension<br><input type="checkbox"/> Bradycardia or heart block<br><input type="checkbox"/> Severe HF / low output<br><input type="checkbox"/> Asthma / COPD<br><input type="checkbox"/> Other _____                                                               |
| <input type="checkbox"/> Heart Failure<br><input type="checkbox"/> EF < 40%<br>EF % _____<br>EF Source _____<br><input type="checkbox"/> EF Planned after DC±<br><br><input type="checkbox"/> EF Not done<br>reason ‡ _____<br><br><input type="checkbox"/> Diastolic<br>dysfunction<br><br>Heart Failure Education | ACE Inhibitor (ARB)<br><input type="checkbox"/> Yes – ACE<br><input type="checkbox"/> Yes – ARB<br><input type="checkbox"/> No                                                                                                                                                             | <input type="checkbox"/> None documented<br><input type="checkbox"/> Allergy<br><input type="checkbox"/> Hypotension<br><input type="checkbox"/> Moderate or severe aortic stenosis<br><input type="checkbox"/> Other _____<br>All HF Pts<br><input type="checkbox"/> Renal Failure<br><input type="checkbox"/> Renal insufficiency<br><input type="checkbox"/> Renal stenosis |
|                                                                                                                                                                                                                                                                                                                     | <input type="checkbox"/> Diet<br><input type="checkbox"/> Weight<br><input type="checkbox"/> Medication management<br><input type="checkbox"/> Symptoms<br><input type="checkbox"/> When to call MD<br><input type="checkbox"/> Follow-up appointment<br><input type="checkbox"/> Activity | ‡For Heart Failure patients, if an EF has not been done w/in one year, you must indicate if it is planned for a f/u visit after hospitalization or put a reason why EF was not done, if available. If unknown, mark unknown.<br><br>"MAWDS" education covers all HF education except f/u appointment.                                                                          |
| <input type="checkbox"/> Atrial Fibrillation @<br>Discharge                                                                                                                                                                                                                                                         | Warfarin (Coumadin)<br><input type="checkbox"/> Yes<br><input type="checkbox"/> No                                                                                                                                                                                                         | <input type="checkbox"/> None documented<br><input type="checkbox"/> Allergy<br><input type="checkbox"/> Age < 65 and no structural heart disease<br><input type="checkbox"/> H/O significant bleeding<br><input type="checkbox"/> History of frequent falls<br><input type="checkbox"/> Other _____                                                                           |
| Smoking Cessation<br><input type="checkbox"/> Current smoker**<br><input type="checkbox"/> Non-smoker<br><input type="checkbox"/> Past smoker                                                                                                                                                                       | Education<br><input type="checkbox"/> Yes<br><input type="checkbox"/> No                                                                                                                                                                                                                   | <input type="checkbox"/> Smoking history unknown<br><br>**Current smoker-smoked within 1 year                                                                                                                                                                                                                                                                                  |

Confidential: Prepared pursuant to Utah Annotated Code 26-25-1 & Idaho Annotated Code 39-1392 for the improvement of quality of hospital & physician and IS NOT PART of the medical record.

| Category                                          | Drug Names                                                                                                                                                                                                                                                                                                                                                | Category      | Drug Names                                                                                                                                                                                                                                                                                                                                                                                                                           |
|---------------------------------------------------|-----------------------------------------------------------------------------------------------------------------------------------------------------------------------------------------------------------------------------------------------------------------------------------------------------------------------------------------------------------|---------------|--------------------------------------------------------------------------------------------------------------------------------------------------------------------------------------------------------------------------------------------------------------------------------------------------------------------------------------------------------------------------------------------------------------------------------------|
| Aspirin                                           | Aspirin (Also in Aggrenox®)<br>ASA<br>Ecotrin®<br>Ascriptin®                                                                                                                                                                                                                                                                                              | Antiplatelet  | Cilostazol (Pletal®)<br>Clopidogrel (Plavix®)<br>Dipyridamole (Persantine®, Aggrenox®)<br>Ticlopidine (Ticlid®)                                                                                                                                                                                                                                                                                                                      |
| HmG/Statins                                       | Atorvastatin (Lipitor®)<br>Fluvastatin (Lescol®)<br>Lovastatin (Mevacor®, Advicor®)<br>Pravastatin (Pravachol®)<br>Rosuvastatin (Crestor®)<br>Simvastatin (Zocor®)                                                                                                                                                                                        | Beta Blockers | Acebutolol (Sectral®)<br>Atenolol (Tenormin®, Tenoretic®)<br>Betaxolol (Kerlone®)<br>Bisoprolol (Zebeta®, Ziac®)<br>Carteolol (Cartrol®)<br>Carvedilol (Coreg®)<br>Labetalol (Trandate®, Normodyne®)<br>Metoprolol (Lopressor®, Toprol XL®)<br>Nadolol (Corgard®, Corzide®)<br>Penbutolol (Levato®)<br>Pindolol (Visken®)<br>Propranolol (Inderal®, Inderal-LA®, Inderide®)<br>Sotalol (Betapace®)<br>Timolol (Blocadren, Timolide®) |
| Lipid Lowering<br>Mark no - list as other on form | Colesevlam (Welchol®)<br>Colestipol (Colestid®)<br>Cholestyramine (Questran®, Prevalite®, LoCHOLEST®)<br>Clofibrate (Atromid-S®)<br>Gemfibrozil (Lopid®)<br>Ezetimibe (Zetia®)<br>Fenofibrate (Tricor®)<br>Nicotinic Acid (Niacin®)<br>Niacin, Extended-release (Niaspan®)                                                                                |               |                                                                                                                                                                                                                                                                                                                                                                                                                                      |
| ACE Inhibitors                                    | Benazepril (Lotensin®, Lotrel®)<br>Captopril (Capoten®, Capozide®)<br>Enalapril (Vasotec®, Vasoretic®, Teczem®, Lexxel®)<br>Fosinopril (Monopril®)<br>Lisonopril (Prinivil®, Zestril®, Prinzide®, Zestoretic®)<br>Moexipril (Univasc®, Uniretic®)<br>Perindopril (Aceon®)<br>Quinapril (Accupril®)<br>Ramipril (Altace®)<br>Trandolapril (Mavik®, Tarka®) | ARBs          | Candesartan (Atacand®)<br>Eprosartan (Teveten®)<br>Irbesartan (Avapro®)<br>Losartan (Cozaar®, Hyzaar®)<br>Olmesartan (Benicar®)<br>Telmisartan (Micardis®)<br>Valsartan (Diovan®)                                                                                                                                                                                                                                                    |

| Drug         | Other Contraindications as defined by JCAHO/HCFA Core Measures                                                                                                                                                                                                                                                                     |                                                                                                                                                                                                                                                                                                          |
|--------------|------------------------------------------------------------------------------------------------------------------------------------------------------------------------------------------------------------------------------------------------------------------------------------------------------------------------------------|----------------------------------------------------------------------------------------------------------------------------------------------------------------------------------------------------------------------------------------------------------------------------------------------------------|
| Aspirin      | <ul style="list-style-type: none"> <li>Intolerance to aspirin</li> <li>Active bleeding other than GI</li> </ul>                                                                                                                                                                                                                    | <ul style="list-style-type: none"> <li>Taking NSAID</li> <li>Patient refuses</li> </ul>                                                                                                                                                                                                                  |
| HmG Agents   |                                                                                                                                                                                                                                                                                                                                    |                                                                                                                                                                                                                                                                                                          |
| Beta Blocker | <ul style="list-style-type: none"> <li>Intolerance to beta blockers</li> <li>Bradycardia (heart rate &lt;60 bpm)</li> <li>while not on a beta blocker</li> </ul>                                                                                                                                                                   | <ul style="list-style-type: none"> <li>Systolic blood pressure &lt;100 mmHG</li> <li>PR intervals greater than 0.24 seconds on ECG</li> <li>Bifascicular block on ECG</li> </ul>                                                                                                                         |
| ACE          | <ul style="list-style-type: none"> <li>Intolerance to ACE inhibitor</li> <li>Hyperkalemia</li> </ul>                                                                                                                                                                                                                               | <ul style="list-style-type: none"> <li>History of angioedema, hives, or rash with ACE inhibitor use</li> </ul>                                                                                                                                                                                           |
| Coumadin     | <ul style="list-style-type: none"> <li>Intolerance to warfarin</li> <li>An isolated or single episode of atrial fibrillation that does not recur</li> <li>Induced atrial fibrillation</li> <li>Perioperative atrial fibrillation</li> <li>Platelet dysfunction</li> <li>Vascular malformation</li> <li>Thyrototoxicosis</li> </ul> | <ul style="list-style-type: none"> <li>Blood dyscrasia</li> <li>Active cancer</li> <li>Liver disease</li> <li>Terminal illness</li> <li>Seizure disorder</li> <li>Inability to cooperate with course of treatment</li> <li>Other reason physician documented</li> <li>End stage renal disease</li> </ul> |

|                           |                                                                                                                                      |                                                                                                                                                                                                                          |
|---------------------------|--------------------------------------------------------------------------------------------------------------------------------------|--------------------------------------------------------------------------------------------------------------------------------------------------------------------------------------------------------------------------|
| Ejection Fraction Sources | IHC Cath Lab<br>IHC Echo<br>IHC MUGA<br>Non-IHC facility transfer information<br>Physican notation<br>Planned after Discharge as f/u | EF Ranges if EF described in Text (source is "estimated" for these patients)<br>Mild = 44 Moderate = 30 Severe = 29<br><br>If range is given, pick midpoint of range.<br>If multiple EFs, (cath, echo, etc.) pick lowest |
|---------------------------|--------------------------------------------------------------------------------------------------------------------------------------|--------------------------------------------------------------------------------------------------------------------------------------------------------------------------------------------------------------------------|

ACEI = angiotensin-converting enzyme inhibitor; ADA = American Diabetes Association; AHA = American Heart Association; AMI = acute myocardial infarction; ARB = angiotensin-receptor blocker; ASA = aspirin; CAD = coronary artery disease; DNS = do not substitute; EF = ejection fraction; HF = heart failure; LDL = low-density lipoprotein; MD = physician; N/A = not applicable; NR = no refills; prn = as needed; PTCA = percutaneous transluminal coronary angioplasty; Qty = quantity; R/A = room air.
